# Supplementary material for: Comparative Analysis of Toxic Responses of Organic Extracts from Diesel and Selected Alternative Fuels Engine Emissions in Human Lung BEAS-2B Cells
Source: MDPI journal article supplement (doi:10.3390/ijms17111833), 2016-11-03
Supplement: s1 [file s1]

# Supplementary Materials: Comparative Analysis of Toxic Responses of Organic Extracts from Diesel and Selected Alternative Fuels Engine Emissions in Human Lung BEAS-2B Cells

Helena Libalova, Pavel Rossner, Jr., Kristyna Vrbova, Tana Brzicova, Jitka Sikorova, Michal Vojtisek-Lom, Vit Beranek, Jiri Klema, Miroslav Ciganek, Jiri Neca, Katerina Pencikova, Miroslav Machala and Jan Topinka

(A)

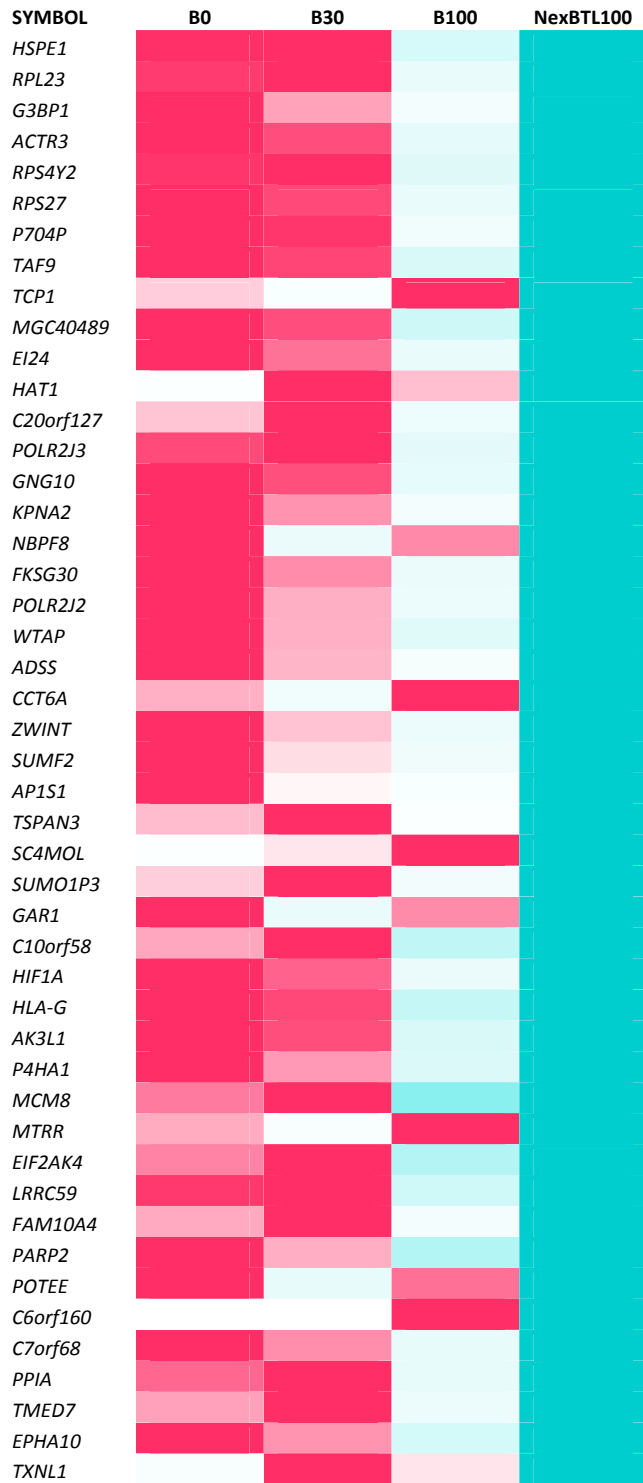

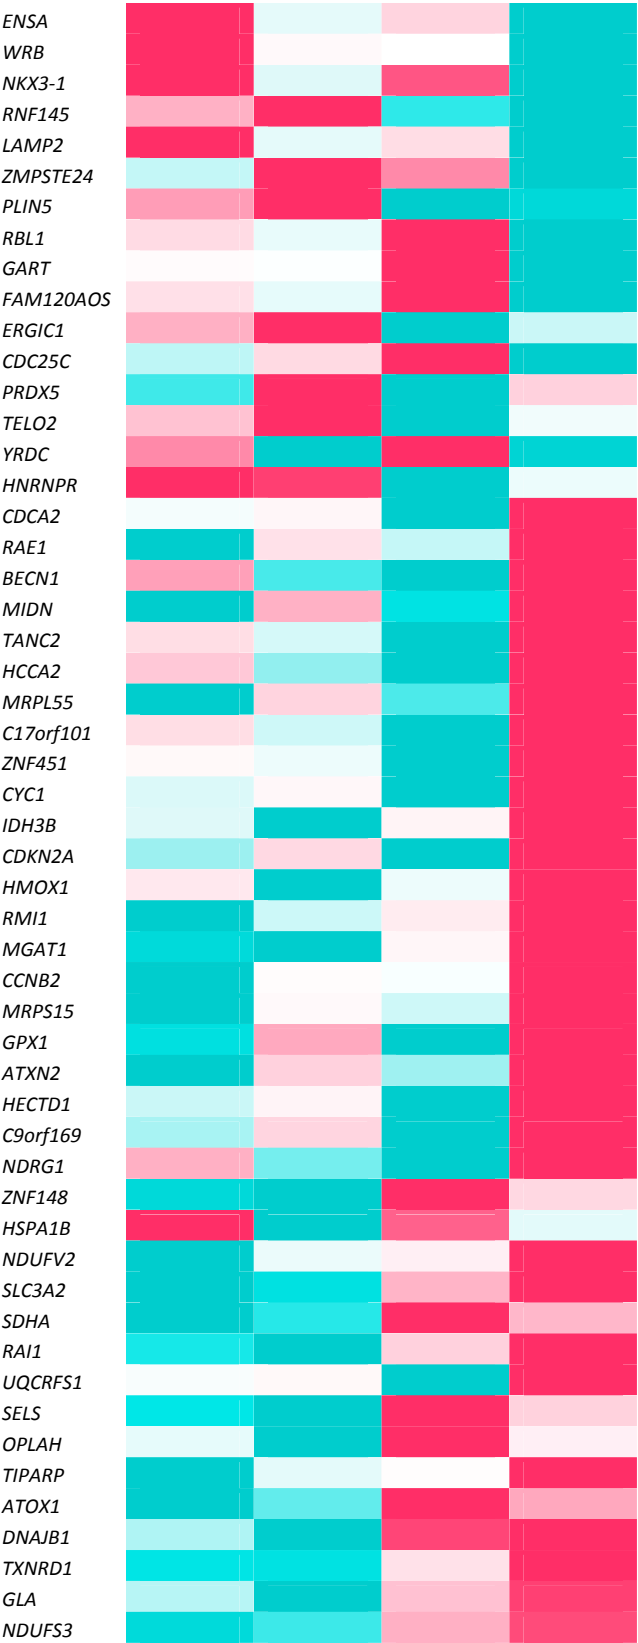

(B)

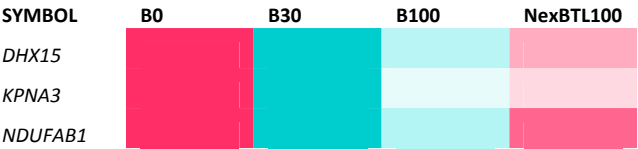

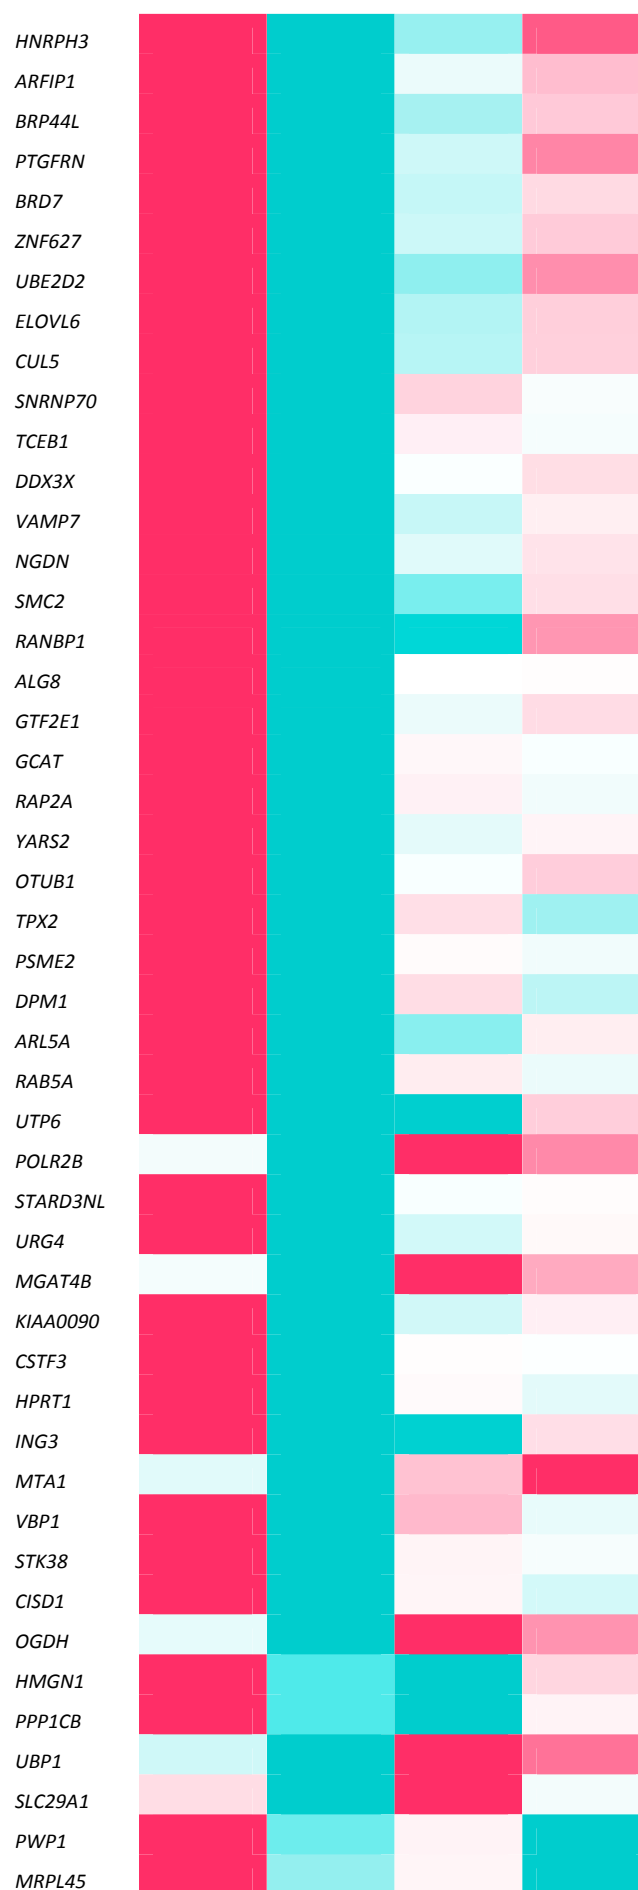

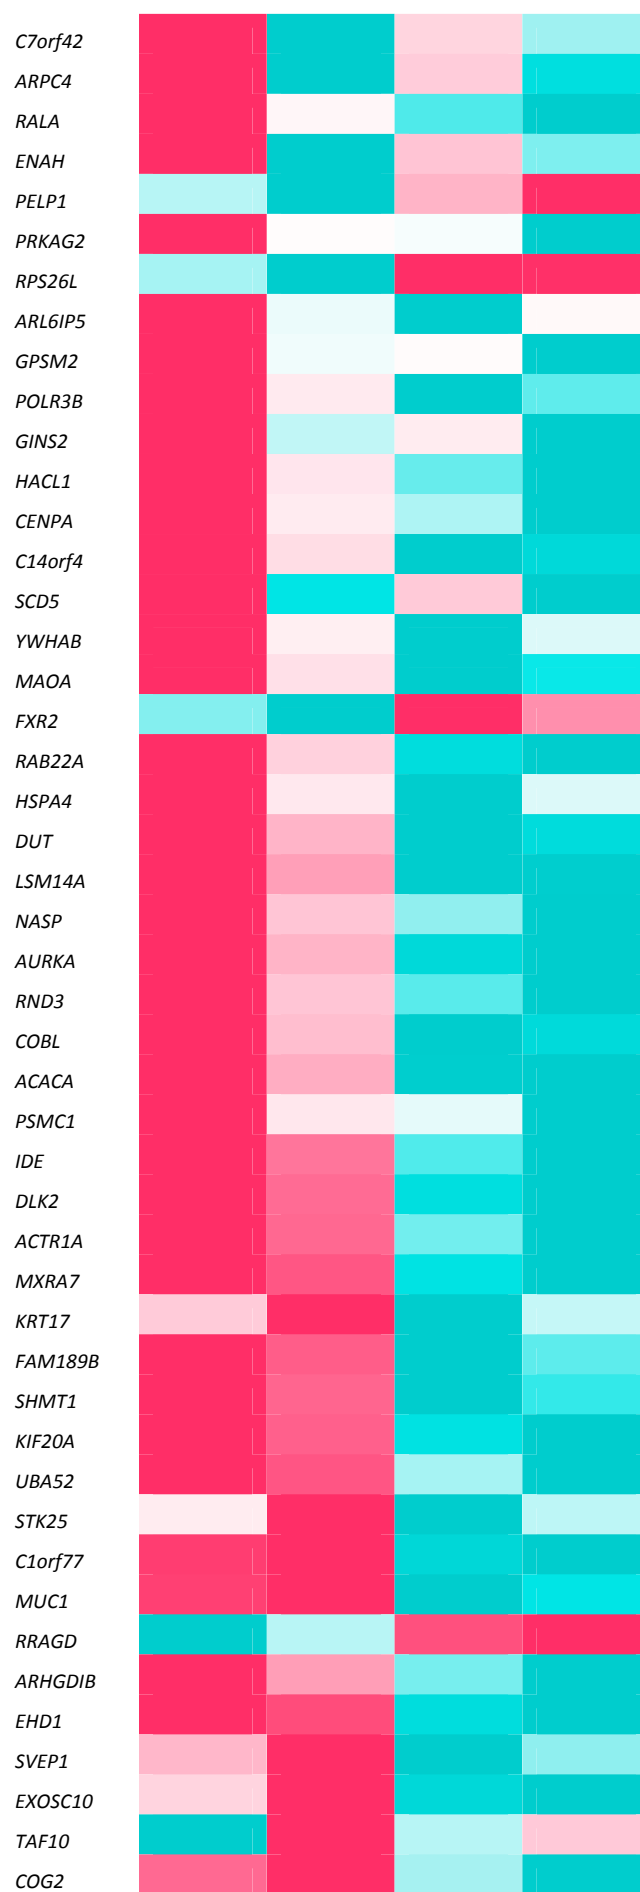

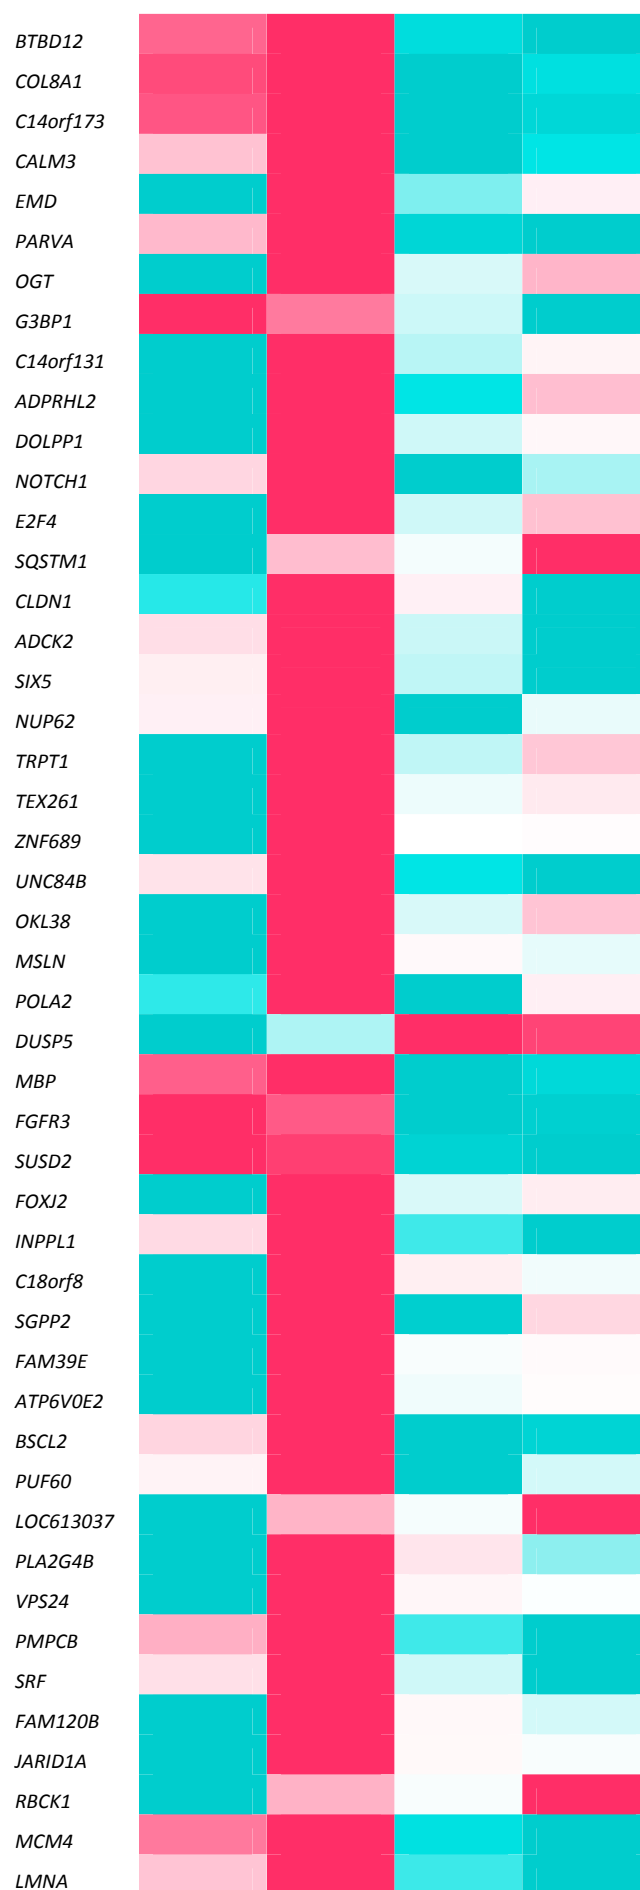

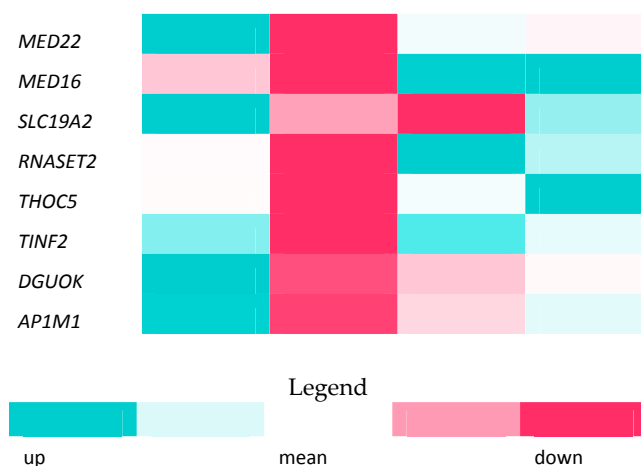

**Figure S1.** Top differentially expressed genes among diesel exhaust particles (DEP) extract treatments identified by one-way ANOVA ( $p$  value  $< 0.05$ ,  $\log FC > \pm 1.5$ ). Heat maps show relative expression of significantly modulated genes after (A) 4 h and (B) 24 h exposure to all DEP extracts. Each row corresponds to a gene (gene symbols are listed to the right of each row) and each column to a sample. The colors are scaled by row; red and blue indicate two standard deviations below or above the mean (white), respectively.

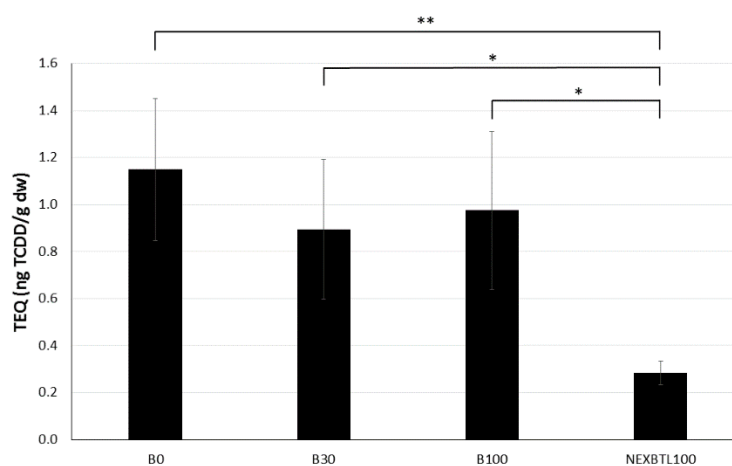

**Figure S2.** The aryl hydrocarbon receptor (AhR)-mediated activity of B0, B30, B100 and NEXBT100 extracts determined in human hepatoma HepG2 stable transfected by luciferase reporter gene under the control by the AhR (DR-CALUX assay). The activities were expressed as 2,3,7,8-tetrachlorodibenzo-p-dioxin (TCDD) equivalents (TEQs). \*  $p$ -value  $< 0.05$ , \*\*  $p$ -value  $< 0.01$ .

**Table S2.** Sequences of primers used in RT-qPCR.

| Symbol        | RefSeq ID   | Oligonucleotide |                            |
|---------------|-------------|-----------------|----------------------------|
| <i>AKR1C2</i> | NM_001354.4 | sense           | GGTATTTATCAGTCAGTGCCTCTC   |
|               |             | antisense       | TGCTAGTCAATATCGCTCATCCT    |
| <i>TXNRD1</i> | NM_182743.1 | sense           | CTTGGATAGGAGTTGGTGAATAGAA  |
|               |             | antisense       | GGGCTTGAGACTGGTGACTT       |
| <i>HMOX1</i>  | NM_002133.1 | sense           | GGAAGCCCCCACTCAACA         |
|               |             | antisense       | GCATAAAGCCCTACAGCAACT      |
| <i>CYP1A1</i> | NM_000499.2 | sense           | CAAGGTGTTAAGTGAGAAGGTG     |
|               |             | antisense       | AGCAGGATAGCCAGGAAGAG       |
| <i>CYP1B1</i> | NM_000104.2 | sense           | CACTGGAAACCGCACCTC         |
|               |             | antisense       | AGCACCGACAGGAGTAGC         |
| <i>TPX2</i>   | NM_012112.4 | sense           | CAGGAGGAATATAAGGAAGTGAAC   |
|               |             | antisense       | TGGGACAGGTTGAAAGGCTTA      |
| <i>CCNB2</i>  | NM_004701.2 | sense           | TGGAGAATATTGACACAGGAGTTAAT |
|               |             | antisense       | TGGGTTGAACTGGAACCTTGG      |
| <i>CDKN2A</i> | NM_058195.2 | sense           | ATGTCCTGCCTTTTAACGTAGATA   |
|               |             | antisense       | CTCACTCCAGAAAACCTCCAACA    |
| <i>HSPE1</i>  | NM_002157.1 | sense           | ATTATGCTTCCAGAAAAATCTCAACG |
|               |             | antisense       | CTTTATCTCCAACCTTTCACGCTAAC |
| <i>FOSL1</i>  | NM_005438.2 | sense           | AGCCCAGAGACTTTGTAGATCCTT   |
|               |             | antisense       | TTCTGTCAGGAGATAGGGTTGGG    |
| <i>BNIP3</i>  | NM_004052.2 | sense           | AGACCCACAGGACACTAAC        |
|               |             | antisense       | GACCTCTTTCCTCCTCTCCAT      |
